# Supplementary material for: Synthesis and crystal structure of a new supramolecular complex: [(ZnTPP)2Prz]·C60·5.34C7H8·0.66C6H5CN
Source: Royal Society of Chemistry journal article supplement (doi:10.1039/b303415a), 2003-01-01
Supplement: b303415a.doc [file b303415a.doc]

Supporting information

***Materials:*** ZnTPP and Prz were purchased from Aldrich. C60 of 99.98 % purity was used from MTR Ltd.. Toluene and benzonitrile was doubly distilled over Na/benzophenon in the argon atmosphere.

***General:*** UV-visible-NIR spectra were measured on Shimadzu-3100 spectrometer in 240-2600 nm range. FT-IR spectra were measured in KBr pellets with a Perkin-Elmer 1000 Series spectrometer (400-7800 cm-1).

***Elemental analyse [(ZnTPP)2Prz]C605.34C7H80.66C6H5CN: C190.5H98.02N10.66Zn2***

| **Elements** | **Found** | **Calculated** |
| --- | --- | --- |
| C (%) | 87.35 | 85.81 |
| H (%) | 3.15 | 3.68 |
| N (%) | 5.43 | 5.60 |
| Zn (%) | 4.13 | 4.91 |

***IR spectrum of the complex 1 and starting compounds (cm-1)***

| Compaunds | ZnTPP | Prz | C6H5CH3 | C6H5CN | C60 | **1** |
| --- | --- | --- | --- | --- | --- | --- |
| ZnTPP | 433w  670m  675m  702s  717m  752s  797s  833w  993s  1001s  1068m  1109w  1176m  1203m  1339s  1385w  1439m  1485m  1522m  1595m  1653s  2924w  3024w  3053w  3103w |  |  |  |  | 432m  660m  670w  700s  716m  752s  794s  832w  992s  1002s  1068m  1176w  1202m  1338m  1438m  1482m  1522m  1596m  1654m  2922w  3014w  3050w  3116w |
| Prz |  | 680m  700w  1040m  1350m  1530m  1600m  2335s  2365s  2880w  2933m |  |  |  | 684w  1560m  1606w  2344m  2362m  2922w |
| C6H5CH3 |  |  | 464m  694s  728s  1029w  1081w  1495m  1604w  3026m |  |  | 466w  696w  728m  1035m |
| C6H5CN |  |  |  | 554m  686m  754s  1445w  1490m  2235w  3090m |  | 548m  684m  755s |
| C60 |  |  |  |  | 526s  576m  1182m  1429s | 527s  578m  1181m  1427m |
| **w** - weak, **m** - middle, and **s** - strong intensity. | | | | | | |

***X-ray Crystallography***

Crystallographic data and parameters of the X-ray analysis for 1 are listed in Table 1. X-ray diffraction data were collected at 90K on a Bruker 1K SMART CCD diffractometer equipped with the rotating anode (MoK radiation, =0.71073 Å). The data were collected by a rotation method with 0.3 frame width ( scan). Data collection nominally covered full reciprocal space by a combination of six ω scans (600 frames in each set), with different φ angle. Reflection intensities were integrated using SAINT program.1

The solution and the refinement of the structures were performed with SHELXTL program package.2 The structure was refined by full-matrix least squares against F2 of all the data. Non‑hydrogen atoms were refined in an anisotropic approximation. Hydrogen atoms were revealed from the difference Fourier maps and refined using the ‘riding’ model (Uiso=1.5Ueq of the preceding carbon atom for CH3 hydrogens and Uiso=1.2Ueq for the rest H-atoms).

The asymmetric unit contains toluene and benzonitrile solvent molecules (six in total) with partial occupancies. This makes stoicheometry of the crystal as follows: [(ZnTPP)2Prz]C605.34Toluene0.66Benzonitrile. Only two of the toluene molecules are ordered, the rest solvent molecules are disordered. The other toluene molecules are disordered through the non-crystallographic inversion center, which almost resides at the center of the toluene benzene ring. Two more toluene and two benzonitrile molecules occupy two sites, each site has fully overlapped toluene and benzonitrile molecules. Although these two sites are 100% occupied, each molecule in each site has partial occupancy. At the first site toluene/benzonitrile ratio is 0.54/0.44, while at the other one 0.78/0.22. The last two toluene molecules (C43S…C46S and C47S…C51S) occupy one site (50/50) and reside in a special position at the inversion center, each of them being disordered through it, making this site occupied by one toluene molecule in each unit cell.

Several restraints were used to bring geometries of some fullerene bonds and disordered solvent molecules to reasonable values. Some 5-6 and 6-6 bonds of the fullerene molecule were restrained to their ideal values 1.450(3)Å and 1.380(3)Å, respectively. Benzene rings of toluene and benzonitrile solvent molecules were constrained to be perfect hexagons, with C-C bonds of 1.390Å. All CH3-CAr bonds of the solvents were restrained to be 1.450(3)Å, while all NCAr bonds of the disordered benzonitrile molecules were restrained to be 1.210(3)Å. Carbon atoms of toluene molecules C43S…C46S and C47S…C51S were refined in an isotropic approximation due to severe disorder. Their bond lengths were restrained to be 1.390(2)Å (CAr-CAr) and 1.450(3)Å (CMe-CAr).

**References**

1. SMART and SAINT, Area detector control and integration software, Ver. 6.01., Bruker Analytical X‑ray Systems, Madison, Wisconsin, U.S.A, 1999.
2. SHELXTL, An integrated system for solving, refining and displaying crystal structures from diffraction data, Ver. 5.10. Bruker Analytical X-ray Systems, Madison, Wisconsin, U.S.A, 1997.
